# Supplementary material for: LncRNA H19 Regulates Breast Cancer DNA Damage Response and Sensitivity to PARP Inhibitors via Binding to ILF2
Source: Int J Mol Sci. 2023 May 23;24(11):9157. doi: 10.3390/ijms24119157 (PMC10252380; doi:10.3390/ijms24119157)
Supplement: Supplementary file 1 [file ijms-24-09157-s001.zip]

Archive with 7 entries (7 files):
- Figure S1.JPG
- Figure S2.JPG
- Figure S3.JPG
- ijms-2377748-Supplementary Materials.pdf
- Table S1.xlsx
- Table S2.xlsx
- Table S3.xlsx
