# Supplementary material for: LncRNA H19 Regulates Breast Cancer DNA Damage Response and Sensitivity to PARP Inhibitors via Binding to ILF2
Source: Int J Mol Sci. 2023 May 23;24(11):9157. doi: 10.3390/ijms24119157 (PMC10252380; doi:10.3390/ijms24119157)
Supplement: Supplementary file 1 [file ijms-24-09157-s001.zip › Table S1.xlsx]

## Sheet: Sheet1
Primer Names	Forward Primer Sequences	Reverse Primer Sequences
GAPDH qRT-PCR Primer	TGCACCACCAACTGCTTAGC	GGCATGGACTGTGGTCATGAG
NEAT1 qRT-PCR Primer	CTTCCTCCCTTTAACTTATCCATTCAC	CTCTTCCTCCACCATTACCAACAATAC
MALAT1 qRT-PCR Primer	GACGGAGGTTGAGATGAAGC	ATTCGGGGCTCTGTAGTCCT
H19 qRT-PCR Primer	GACTCAGGAATCGGCTCTGG	TGGCCATGAAGATGGAGTCG
18S rRNA qRT-PCR Primer	CGGCGACGACCCATTCGAAC	GAATCGAACCCTGATTCCCCGTC
ILF2 qRT-PCR Primer	CTTTCCCCGGGTCAAGCC	TTCAAATGTCCCTGGAGCCAC
BRCA1 qRT-PCR Primer	GTCCAAAGCGAGCAAGAG	CACCACAGAAGCACCACA
U6 qRT-PCR Primer	TGGAACGATACAGAGAAGATTAGCA	AACGCTTCACGAATTTGCGT
H19 Clone Primer	GGAGAATTCAGTTAGAAAAAGCCCGGGCTAG	GCGGGATCCGCTGTAACAGTGTTTATTGATG
ILF2 Clone Primer	CGACGCGTATGAGGGGTGACAGAGG	GACTAGTTCACTCCTGAGTTTCCATGCTTTCTTCTTCC
H19 1# Clone Primer	AGTTAGAAAAAGCCCGGGCTAGG	CCTGCCCCTCTGCTGGG
H19 2# Clone Primer	ATGGGGGCAGGAGAGTTAG	CTGGTCTCGCCCCATG
H19 3# Clone Primer	ACTAGGCGAGGCGGGC	GGGCTGATGAGGTCTGGTTC
H19 4# Clone Primer	AACATCAAAGACACCATCG	TTGCTGTAACAGTGTTTATTG
H19 Sense T7	TGTAATACGACTCACTATAGGGAGTTAGAAAAAGCCCGGGCT	TTGCTGTAACAGTGTTTATTGATGATGAGTCCAGGGCT
H19 Antisense T7	TGTAATACGACTCACTATAGGGTTGCTGTAACAGTGTTTATTG	AGTTAGAAAAAGCCCGGGCTAGGACCG
H19 FISH Probe	TGTAATACGACTCACTATAGGGGCTGGAGACGAGGC	CCCGCTGGAGGAGCTCAGCTCTGG
ACTIN FISH Probe	TGTAATACGACTCACTATAGGGACAACGGCTCCGG	CGGCCAGCCAGGTCCAGACGC
