# Supplementary material for: LncRNA H19 Regulates Breast Cancer DNA Damage Response and Sensitivity to PARP Inhibitors via Binding to ILF2
Source: Int J Mol Sci. 2023 May 23;24(11):9157. doi: 10.3390/ijms24119157 (PMC10252380; doi:10.3390/ijms24119157)
Supplement: Supplementary file 1 [file ijms-24-09157-s001.zip › Table S2.xlsx]

## Sheet: Sheet1
shRNA Names	shRNA Sequences
H19 shRNA-1	CCGGGACGTGACAAGCAGGACATGAGGATCCTCATGTCCTGCTTGTCACGTCTTTTTG
H19 shRNA-2	CCGGGCTCTGGAAGGTGAAGCTAGAGGATCCTCTAGCTTCACCTTCCAGAGCTTTTTG
ILF2 shRNA-1	CCGGCCCATTTGTGACCTATGCCATCTCGAGATGGCATAGGTCACAAATGGGTTTTT
ILF2 shRNA-2	CCGGCCTGGGATGGAGTGATAGTAACTCGAGTTACTATCACTCCATCCCAGGTTTTT
