# Supplementary material for: LncRNA H19 Regulates Breast Cancer DNA Damage Response and Sensitivity to PARP Inhibitors via Binding to ILF2
Source: Int J Mol Sci. 2023 May 23;24(11):9157. doi: 10.3390/ijms24119157 (PMC10252380; doi:10.3390/ijms24119157)
Supplement: Supplementary file 1 [file ijms-24-09157-s001.zip › Table S3.xlsx]

## Sheet: Sheet1
Antibody	Company	Catalogue
53BP1	Novusbio	NB100-304
β-Actin	Proteintech	60008-1-Ig
p-ATM	GeneTex	GTX132146
p-ATR	Abcam	ab178407
BRCA1	Immunoway	YT0519
p-CHK1	GeneTex	GTX100065
p-CHK2	GeneTex	GTX03351
Flag	Proteintech	66008-3-Ig
GAPDH	Proteintech	60004-1-Ig
ILF2	Abcam	ab113205
Ub	Santa Cruz	sc-8017
HUWE1	Proteintech	19430-1-AP
RNF40	Proteintech	15621-1-AP
PSMD1	Santa Cruz	sc-166038
HECTD3	Proteintech	11487-1-AP
DTL	Proteintech	12896-1-AP
RNF168	Santa Cruz	sc-101125
RNF146	Sangon Biotech	D224882
UBE2T	Proteintech	10105-2-AP
